# Supplementary material
Source: publisher figshare collection journal article supplement (https://acs.figshare.com/ndownloader/files/18009260)
Supplement: Supplementary file 1 [file 18009260]

# Supporting Information

## Nanoplasmonic Enhanced High-Performance Metastable Phase $\alpha$ - $\text{Ga}_2\text{O}_3$ Solar-blind Photodetector

Guang Qiao,<sup>†#</sup> Qing Cai,<sup>‡#</sup> Tongchuan Ma,<sup>‡</sup> Jin Wang,<sup>‡</sup> Xuanhu Chen,<sup>‡</sup> Yang Xu,<sup>‡</sup> Zhenguang  
Shao,<sup>†</sup> Jiandong Ye,<sup>\*,‡</sup> and Dunjun Chen<sup>\*,‡</sup>

<sup>†</sup> College of Physics & Electronic Engineering, Changshu Institute of Technology, Changshu,  
215500, China

<sup>‡</sup> The Key Laboratory of Advanced Photonic and Electronic Materials, School of Electronic Science  
and Engineering, Nanjing University, Nanjing 210093, China

<sup>#</sup>G. Qiao and Q. Cai contributed equally to this work.

Corresponding Authors

\*E-mail: djchen@nju.edu.cn (D.C.).

\*E-mail: yejd@nju.edu.cn. (J.Y.).

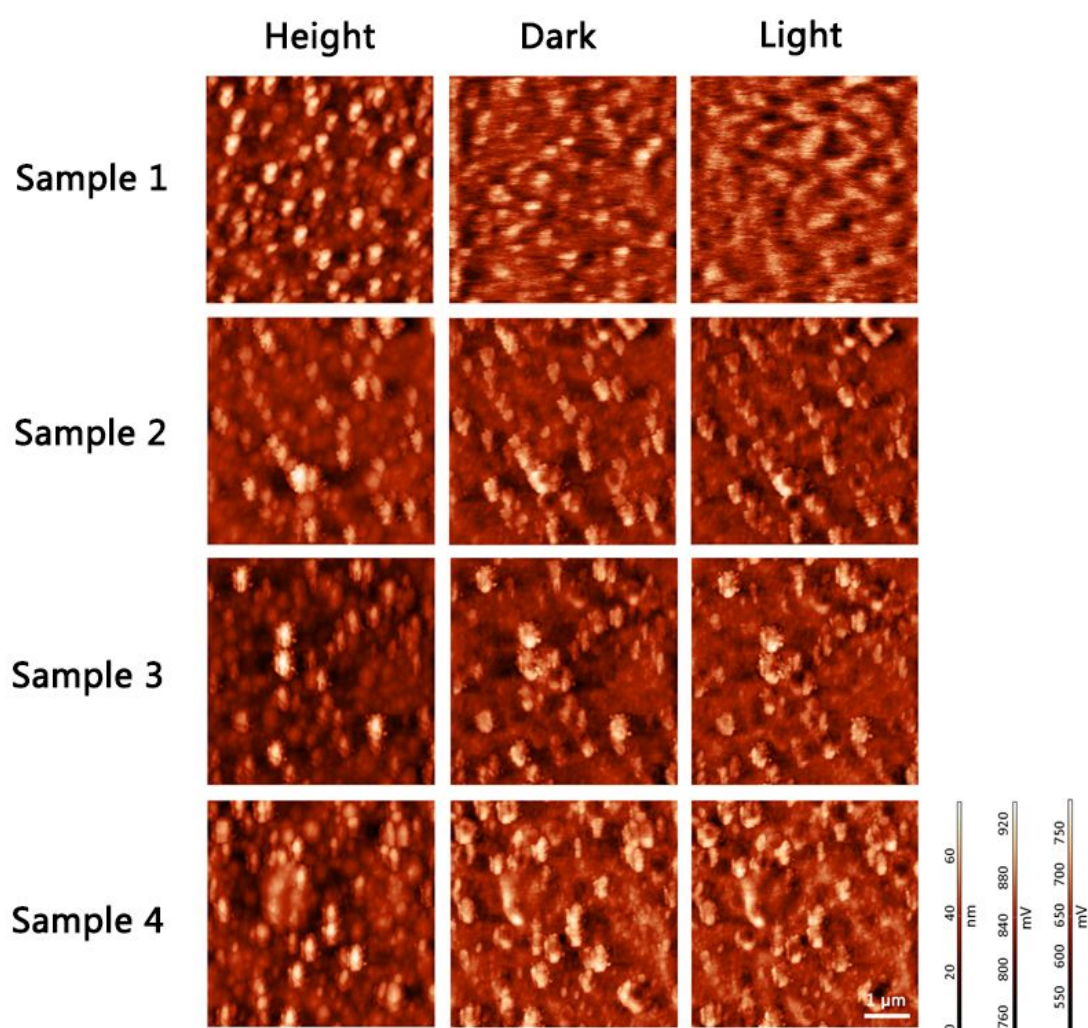

Figure 1. AFM and KPFM images of samples with finger-spacing ranging from 5 to 20  $\mu\text{m}$ .

The sample probed by AFM and KPFM is of 25  $\mu\text{m}$  finger-spacing in the manuscript. Similar characteristics are shown in different samples (sample 1-4 represent devices of finger-spacing ranging from 5 to 20  $\mu\text{m}$ ) on the same wafer. Surface potential exhibits significant decrease around the Al NPs region.
